# Supplementary material
Source: publisher site journal article supplement (https://www.dovepress.com/article/255561)
Supplement: Supplementary file 1 [file get_supplementary_file.php]

| **Criteria** | **Yes** | **No** |  |
| --- | --- | --- | --- |
| Study |  | | |
| 1. Was the research question or objective in this paper clearly stated? |  |  |  |
| 2. Was the study population clearly specified and defined? |  |  |  |
| 3. Was the participation rate of eligible persons at least 50%? |  |  |  |
| 4. Were inclusion and exclusion criteria for being in the study prespecified and applied uniformly to all participants? |  |  |  |
| 5. Was a sample size justification, power description, or variance and effect estimates provided? |  |  |  |
| 6. Was the full period of prophylaxis assessed? |  |  |  |
| 7. Was the timeframe sufficient (<6 months after travel) so that one could reasonably recall details of lack of compliance? |  |  |  |
| 9. Were the exposure variables (travel) clearly defined, valid, and implemented consistently across all study participants? |  |  |  |
| 11. Were the outcome measures (adherence / compliance) clearly defined, valid, and implemented consistently across all study participants? |  |  |  |
| Final grade |  | | |

**Supplementary material**

**Quality assessment tool of included studies**

**This table is a modified version of the quality assessment tool for observational cohort and cross-sectional studies available from National Heart, Lung and Blood Institute (NHLBI), USA*

**Modifications from the original NHLBI tool**

Some questions specific to cohort studies (but not to cross sectional studies) were removed. Some questions (in red) were modified to fit the purpose of this study. The number against each question shows the corresponding question in the original NHLBI tool (the reader may see which questions were dropped and which ones were modified)

The original NHLBI tool is available at: <https://www.nhlbi.nih.gov/health-topics/study-quality-assessment-tools>

The quality was considered “Good” if both questions in red had a “Yes” answer AND if no more than two other questions had a “No” answer. The rest were categorized as poor. In addition, if one question in red had an “unsure” answer with at least one “No” to another answer, the quality was categorized as poor.
